# Supplementary material for: Consortia-mediated bioprocessing of cellulose to ethanol with a symbiotic Clostridium phytofermentans/yeast co-culture
Source: PubMed Central journal article supplement (PMC3653780; doi:10.1186/1754-6834-6-59), 2013-04-29

# Additional file 6

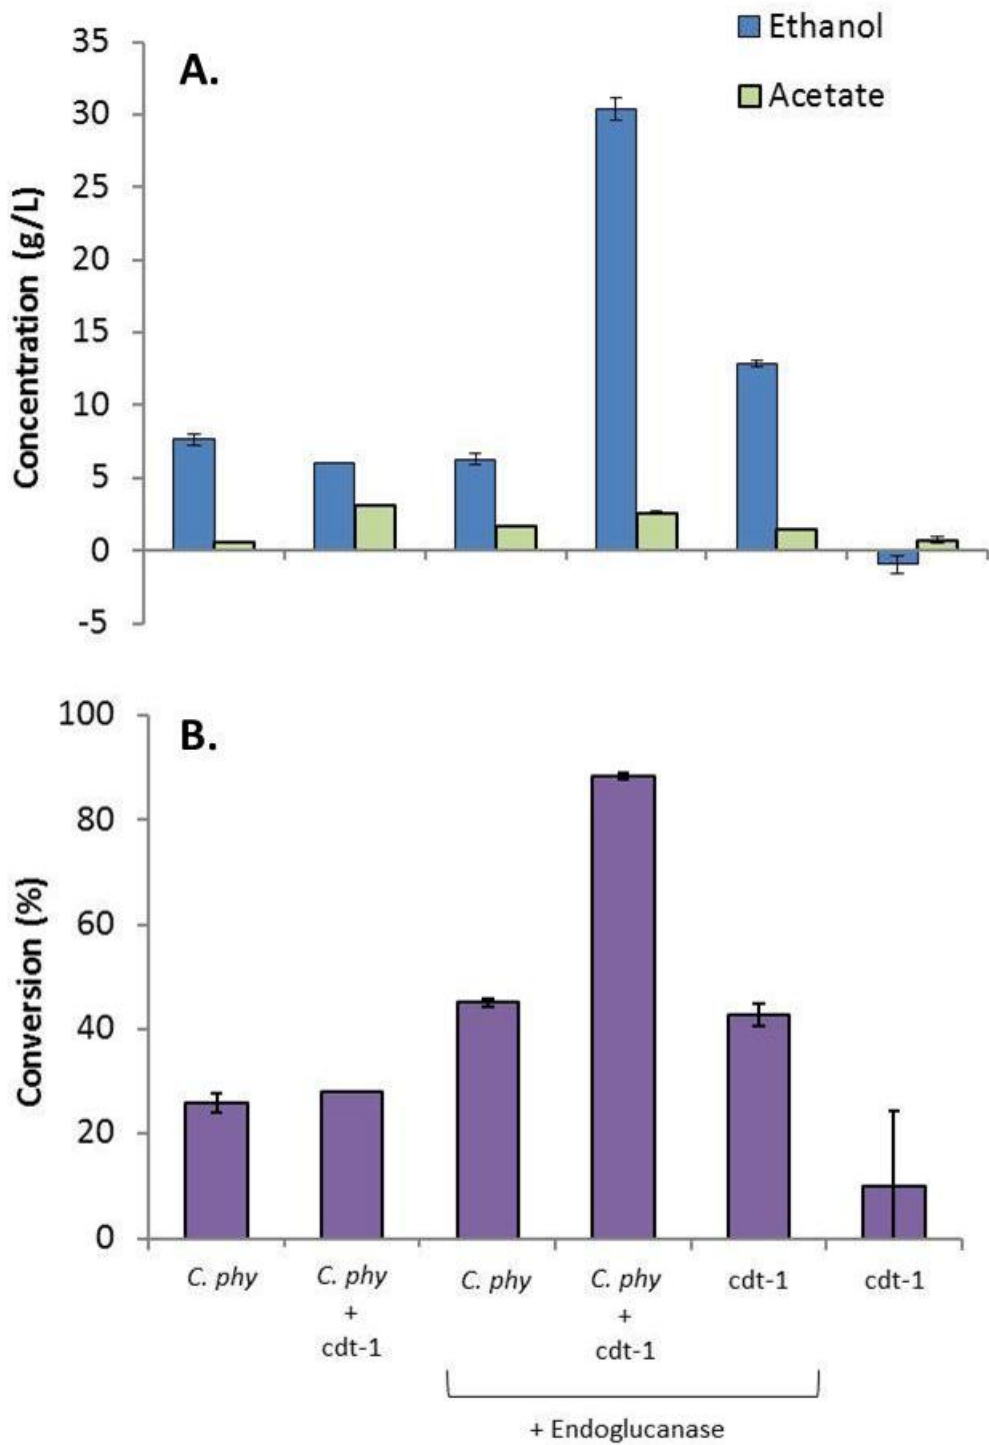

Supplement: 1754-6834-6-59-S6.pdf [file 1754-6834-6-59-S6.pdf]
